# Supplementary material
Source: publisher site journal article supplement (https://www.dovepress.com/article/530074)
Supplement: Supplementary file 1 [file 530074%20Supplementary%20Material.docx]

**Supplementary Material for**

**Combined ε-Toxin Nanovaccine with Enhanced Immunity for Effective Protection in a Murine Model**

**This PDF file includes:**

1. **Figure S1** to **S12**


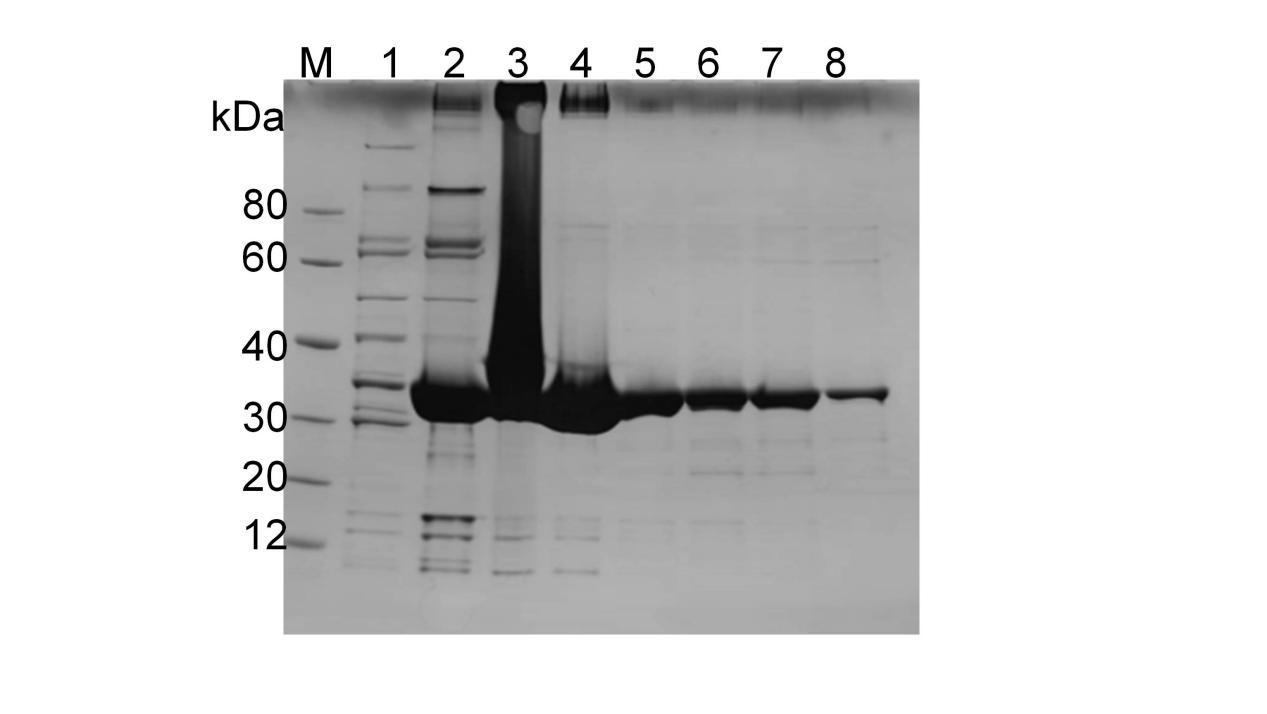


**Figure S1.**SDS-PAGE electrophoresis of purified ETXY196E protein, the theoretical molecular weight of the ETXY196E protein is approximately 32 kDa. Lane M is the protein marker, lane 1~8 are the purified protein solutions.


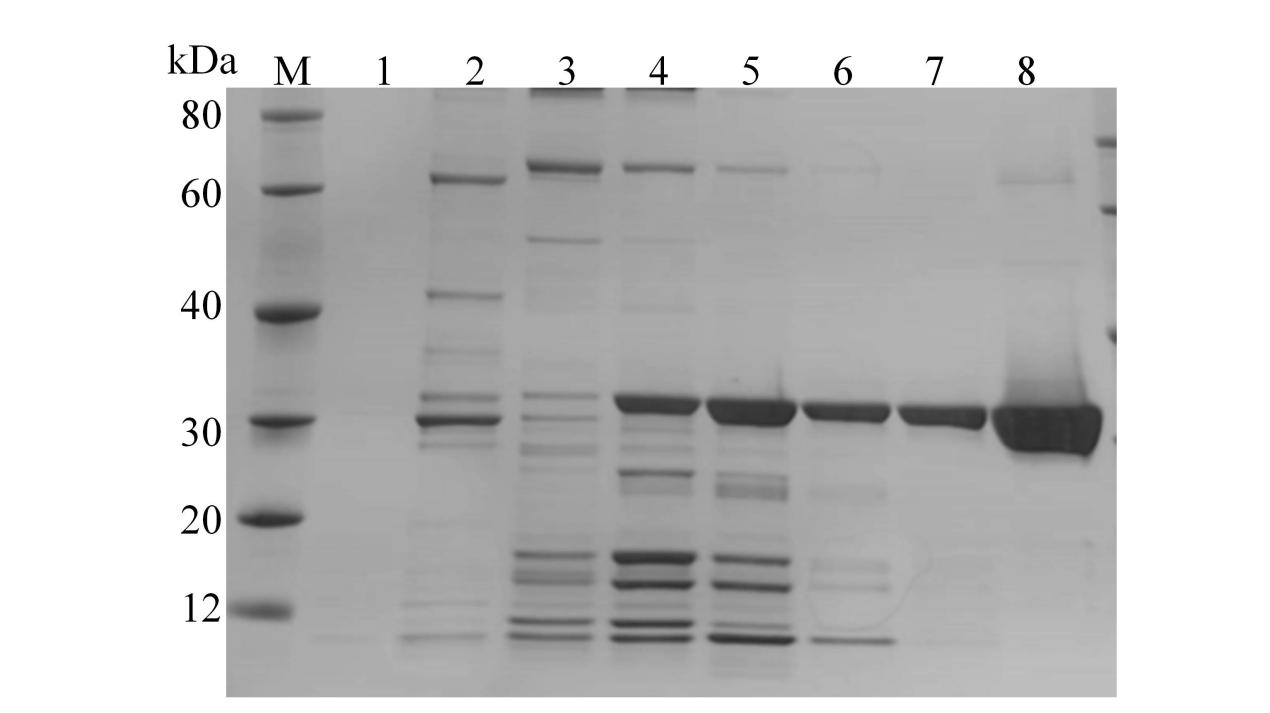


**Figure S2.**SDS-PAGE electrophoresis of purified HIS-ETX protein, the theoretical molecular weight of the HIS-ETX protein is approximately 32 kDa. Lane M is the protein marker, lane 1~8 are the purified protein solutions.


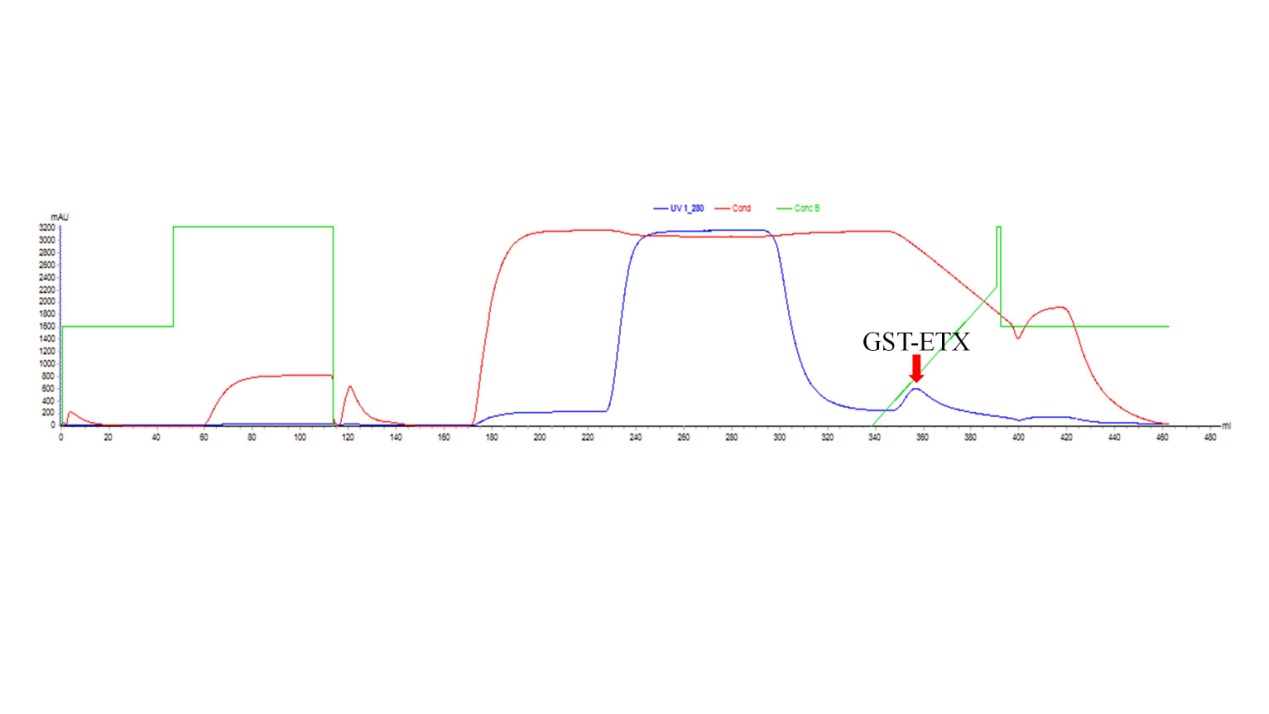


**Figure S3.** The affinity chromatographic profiles of protein GST-ETX.


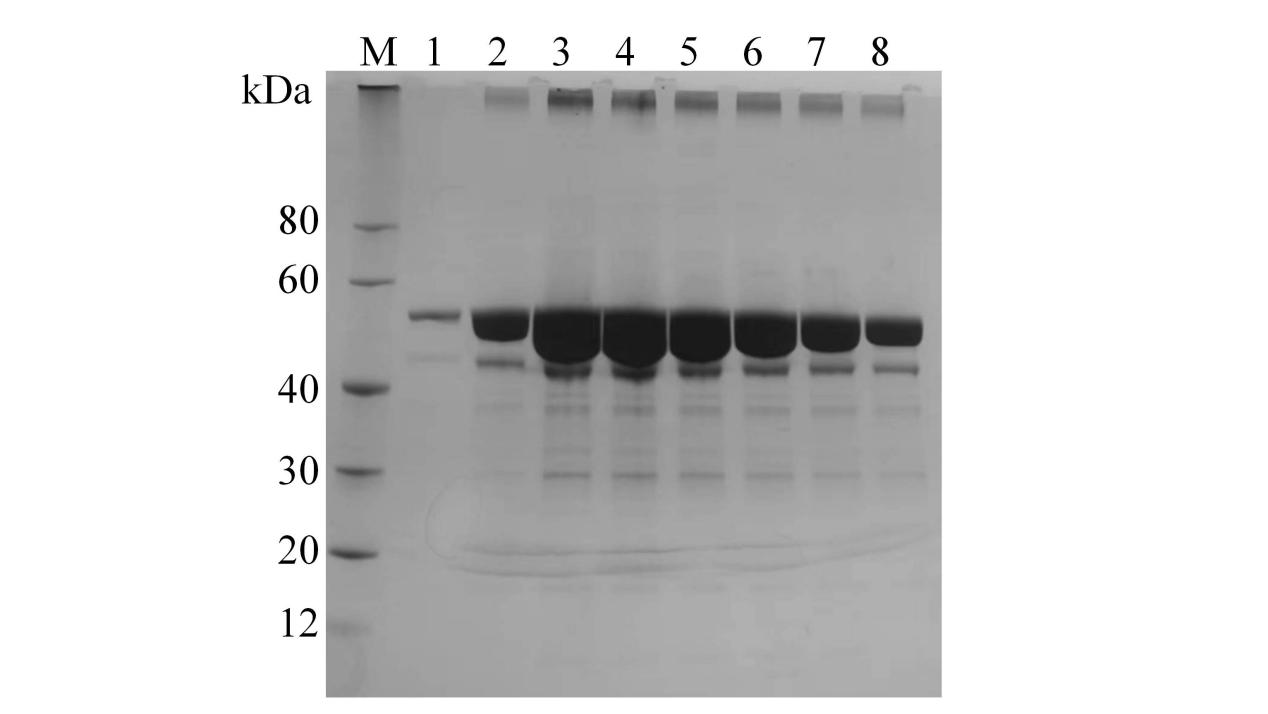


**Figure S4.**SDS-PAGE electrophoresis of purified GST-ETX protein, the theoretical molecular weight of the GST-ETX protein is approximately 56 kDa. Lane M is the protein marker, lane 1~8 are the purified protein solutions.


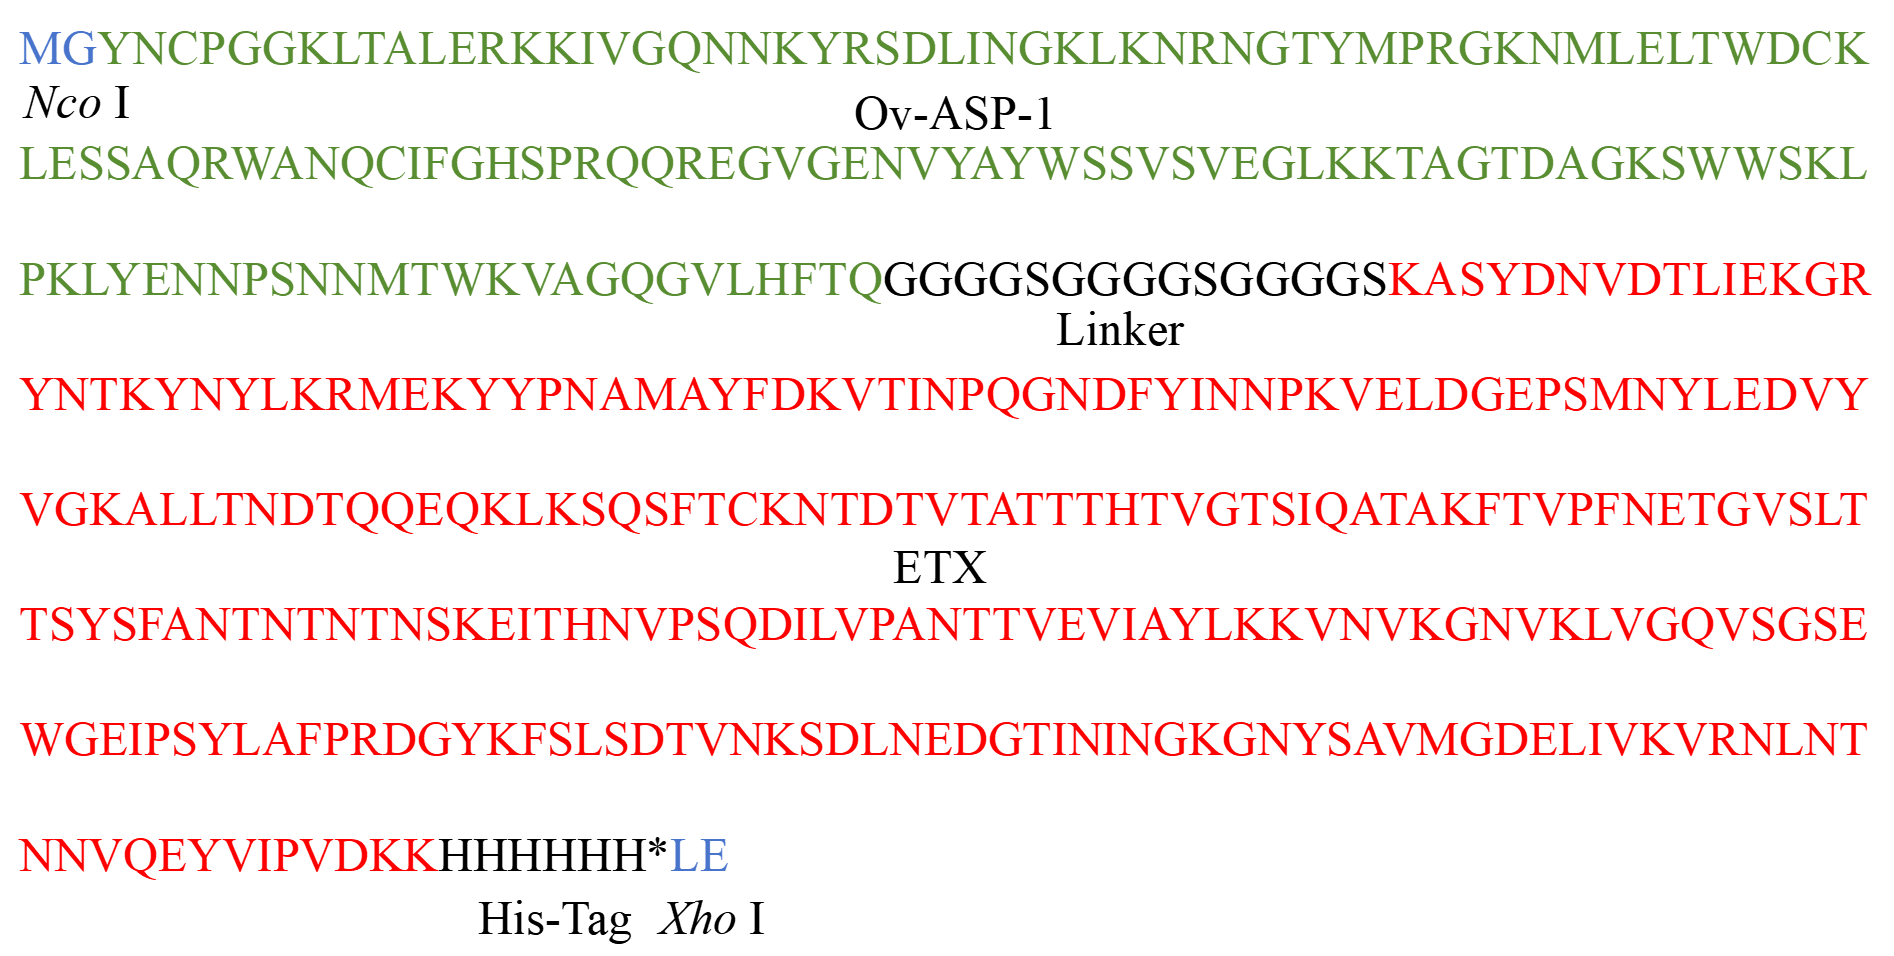


**Figure S5.**Amino acid sequence of ASP-ETX recombinant protein. The Ov-ASP-1 17~152 AAs, 3 flexible Linkers (GGGGS), ETX, 6 × HIS tag and according to the cleavage site of pET-28a, *Nco* Ⅰ (CCATGG) and *Xho* Ⅰ (CTCGAG) cleavage sites were introduced at both ends of the sequence. *: Terminator.


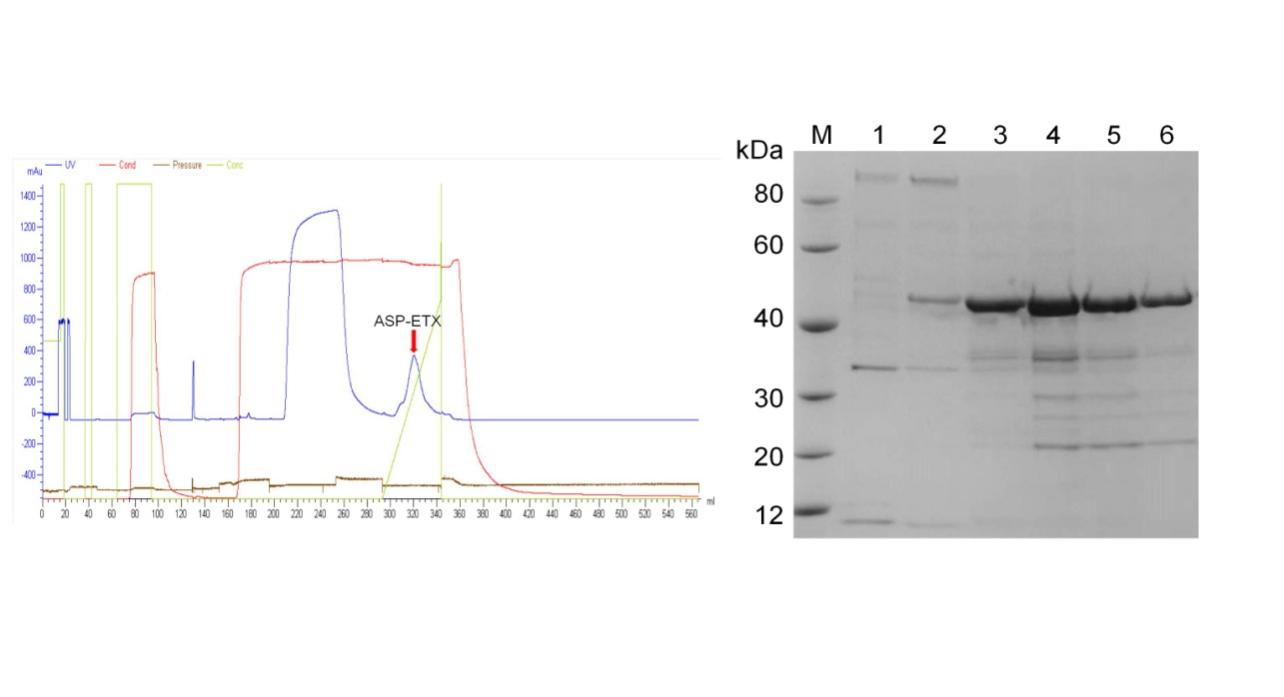


**Figure S6.**SDS-PAGE electrophoresis of purified ASP-ETX protein, the theoretical molecular weight of the ASP-ETX protein is approximately 46 kDa. Lane M is the protein marker, lane 1~6 are the purified protein solutions.


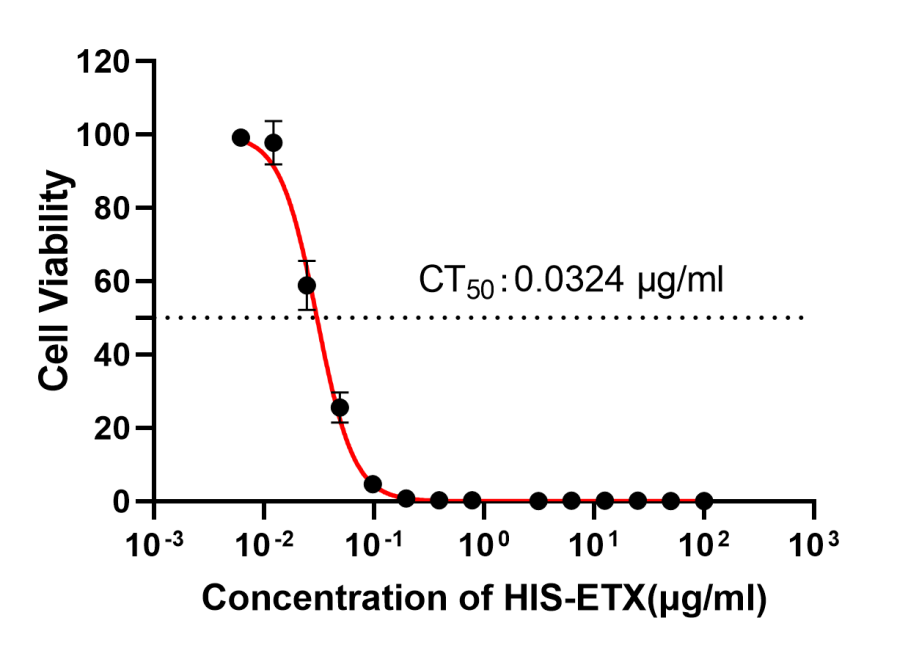


**Figure S7.** *In vitro* toxicities of HIS-ETX (n=3).


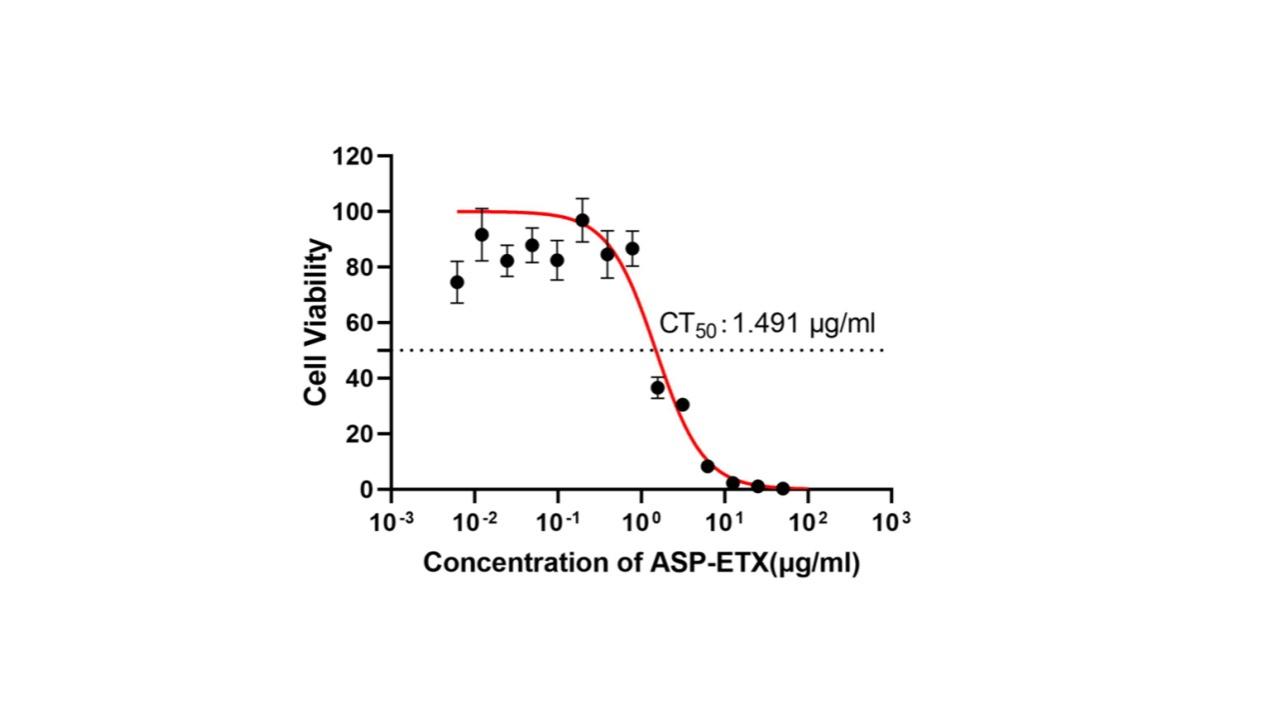


**Figure S8.** *In vitro* toxicities of ASP-ETX (n=3).


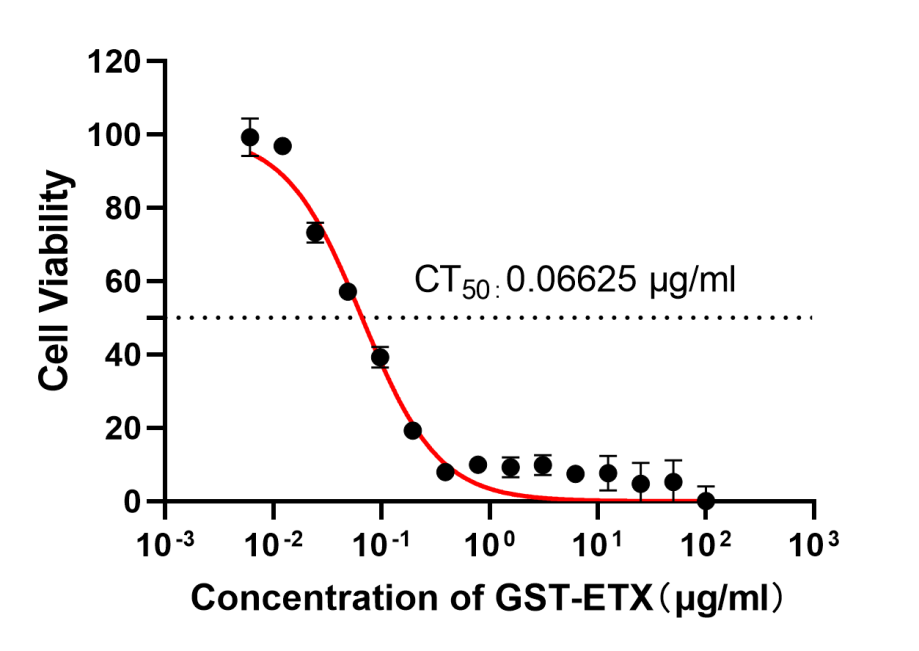


**Figure S9.** *In vitro* toxicities of GST-ETX.


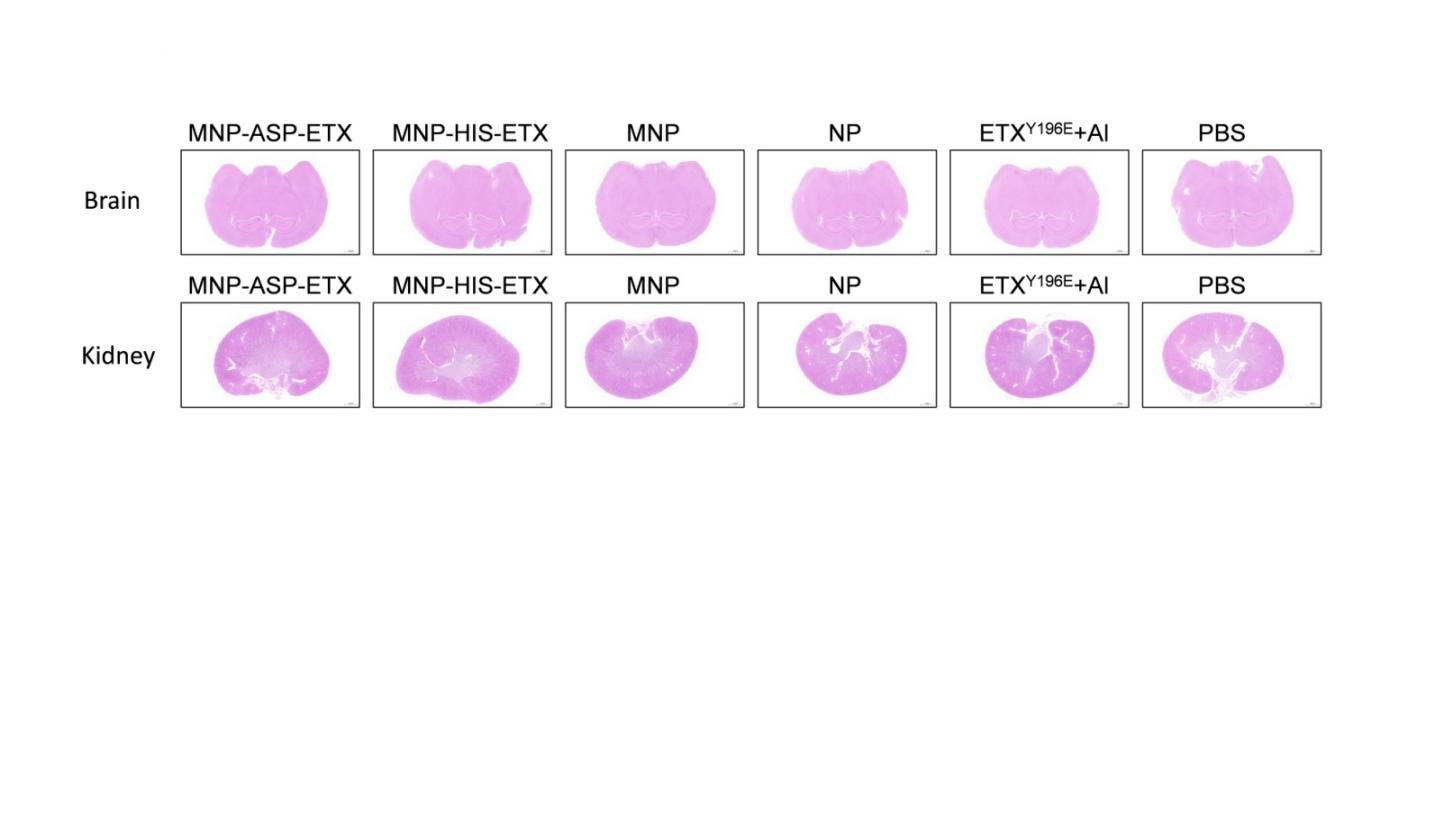


**Figure S10.** Representative sections of mouse brain and kidney in safety experiments, stained with H&E (scale bar: 1 mm).


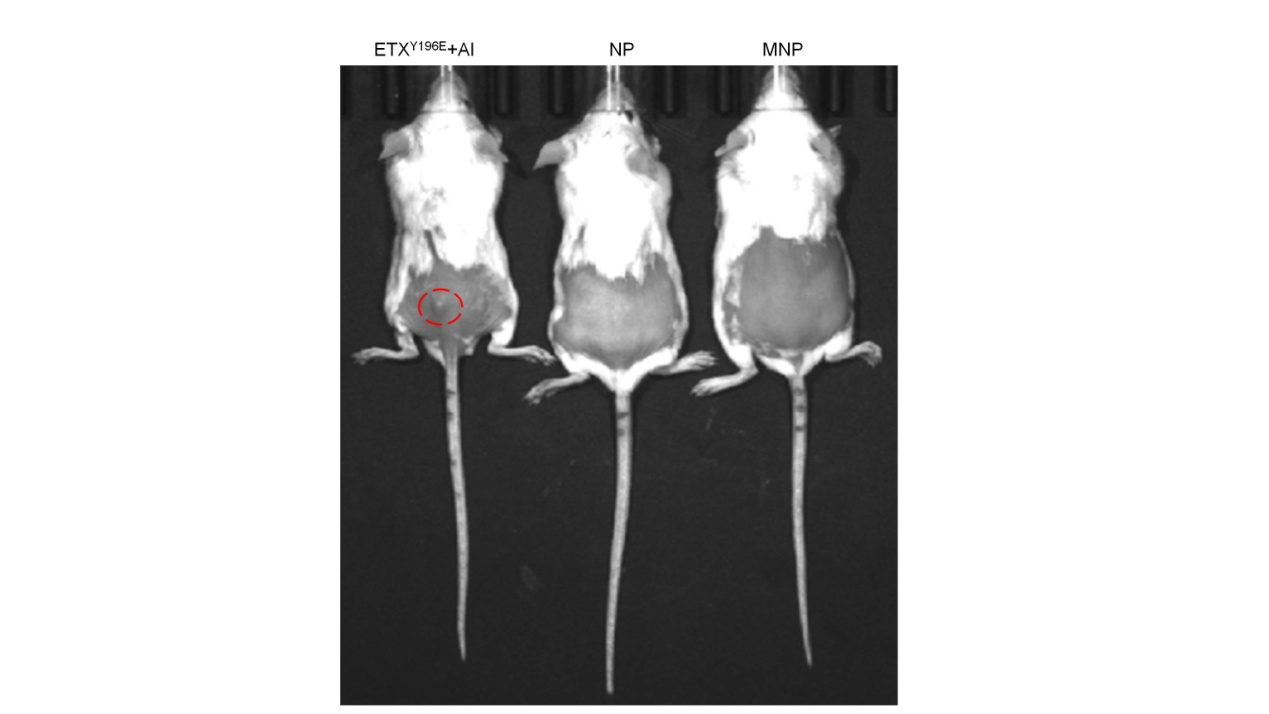


**Figure S11.** The injection site nodules of mice injected with ETXY196E+Al (n=3). The red circle part was obvious s.c. nodule generation in ETXY196E + Al.


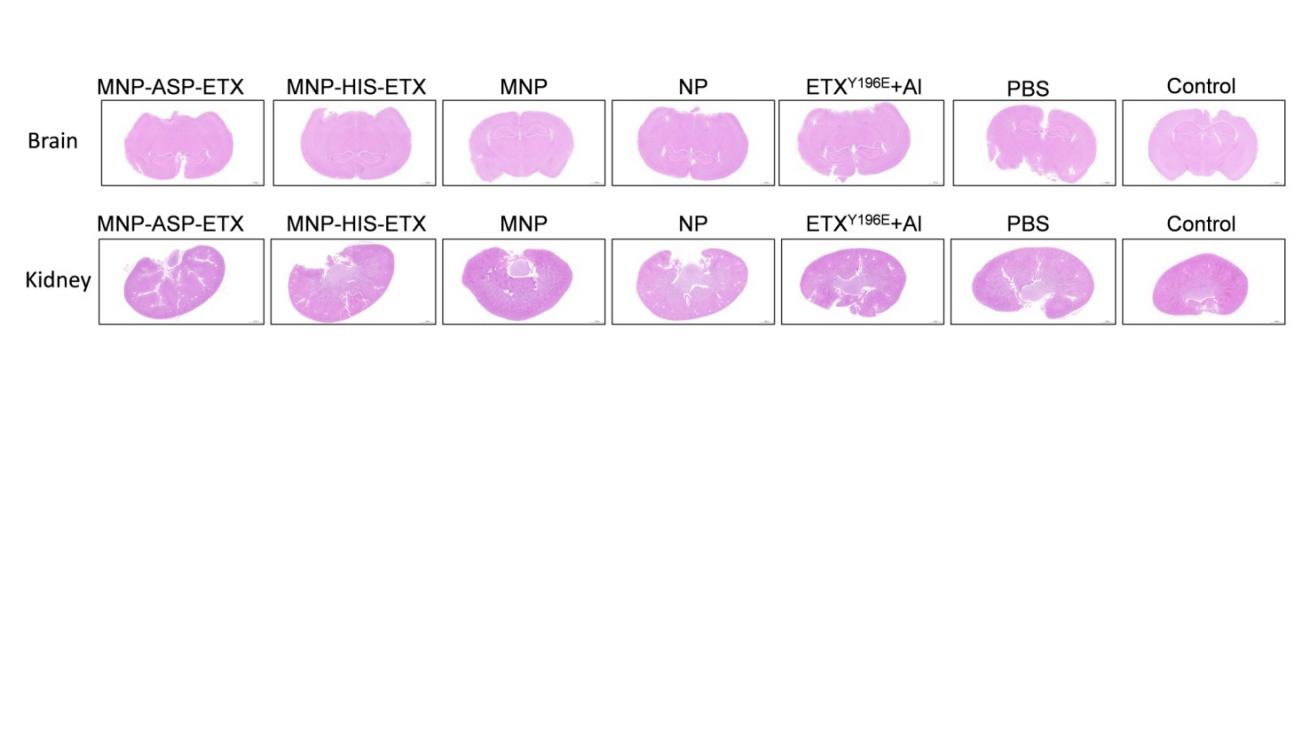


**Figure S12.** Representative sections of mouse brain and kidney in protection experiments, stained with H&E (scale bar: 1 mm).
